# Supplementary material for: Home food environment influences the achievement of the recommended daily vegetable intake of 350 g in Japan
Source: Research Square preprint supplement (doi:10.21203/rs.3.rs-6141964/v1), 2025-04-17
Supplement: Supplementary file 1 [file 286b21d2ff4a1393cc954130.docx]

Additional File 2. Total energy-adjusted average food intake for each food group in vegetable intake groups

| Variables | Men | | |  | Women | | |
| --- | --- | --- | --- | --- | --- | --- | --- |
| <350 g/day | ≥350 g/day | *P-*value* |  | <350 g/day | ≥350 g/day | *P-*value* |
| Mean (95%CI) | Mean (95%CI) |  | Mean (95%CI) | Mean (95%CI) |
| Cereals | 449.4 (447.4-451.4) | 403.8 (401.8-405.8) | 0.108 |  | 315.6 (313.7-317.6) | 273.0 (271.0-275.0) | <0.001 |
| Potatoes | 28.2 (26.2-30.2) | 27.8 (25.8-29.7) | 0.853 |  | 29.6 (27.7-31.6) | 37.8 (35.9-39.8) | 0.032 |
| Sugars and sweeteners | 9.9 (7.9-11.9) | 8.3 (6.3-10.2) | 0.110 |  | 7.9 (5.9-9.8) | 7.6 (5.6-9.5) | 0.933 |
| Beans | 54.2 (52.2-56.2) | 76.5 (74.5-78.5) | 0.039 |  | 64.6 (62.6-66.5) | 67.6 (65.7-69.6) | 0.937 |
| Seeds | 5.8 (3.8-7.8) | 6.9 (4.9-8.9) | 0.901 |  | 4.3 (2.3-6.2) | 5.8 (3.8-7.7) | 0.140 |
| Vegetables | 196.3 (194.3-198.3) | 480.4 (478.4-482.4) | <0.001 |  | 203.5 (201.6-205.5) | 492.3 (490.3-494.2) | <0.001 |
| Fruits | 64.7 (62.7-66.7) | 62.9 (60.9-64.9) | 0.165 |  | 84.3 (82.4-86.3) | 85.9 (83.9-87.9) | 0.541 |
| Mushrooms | 13.2 (11.2-15.1) | 17.4 (15.4-19.4) | 0.157 |  | 16.5 (14.5-18.4) | 21.0 (19.0-22.9) | 0.024 |
| Seaweeds | 10.8 (8.9-12.8) | 13.7 (11.7-15.7) | 0.333 |  | 8.8 (6.9-10.8) | 11.6 (9.7-13.6) | 0.200 |
| Seafood | 52.8 (50.8-54.8) | 62.9 (60.9-64.9) | 0.568 |  | 52.8 (50.8-54.8) | 60.5 (58.6-62.5) | 0.354 |
| Meat | 128.3 (126.3-130.3) | 116.8 (114.8-118.8) | 0.880 |  | 89.2 (87.2-91.1) | 90.5 (88.6-92.5) | 0.214 |
| Eggs | 46.6 (44.6-48.6) | 48.3 (46.4-50.3) | 0.601 |  | 40.5 (38.5-42.5) | 40.6 (38.6-42.5) | 0.949 |
| Dairy products | 140.4 (138.4-142.4) | 146.2 (144.2-148.2) | 0.969 |  | 162.3 (160.4-164.3) | 157.1 (155.1-159.1) | 0.517 |
| Fats and oils | 17.7 (15.7-19.7) | 17.3 (15.3-19.2) | 0.935 |  | 13.1 (11.1-15.0) | 13.6 (11.6-15.5) | 0.638 |
| Confectionery | 24.9 (22.9-26.9) | 21.1 (19.2-23.1) | 0.411 |  | 33.7 (31.7-35.7) | 26.1 (24.2-28.1) | 0.028 |
| Beverages | 658.1 (656.1-660.1) | 601.2 (599.2-603.3) | 0.200 |  | 574.6 (572.6-576.5) | 624.1 (622.1-626.1) | 0.226 |
| Seasonings and spices | 65.8 (63.8-67.8) | 76.7 (74.7-78.7) | 0.048 |  | 53.2 (51.2-55.1) | 60.9 (58.9-62.8) | 0.004 |

CI, confidence interval

**P*-values were calculated using a general linear model with the natural logarithm-transformed mean for significance testing to compare differences between participants consuming less than 350 g/day (<350 g/day) and those consuming 350 g/day or more (≥350 g/day). Total energy intake and age were used as an adjusted variable.
