# Supplementary material for: Home food environment influences the achievement of the recommended daily vegetable intake of 350 g in Japan
Source: Research Square preprint supplement (doi:10.21203/rs.3.rs-6141964/v1), 2025-04-17
Supplement: Supplementary file 2 [file 83cee745ada816655a3e6df7.docx]

Additional File 1. Average vegetable intake by vegetable type in vegetable intake groups

| Variables | Men | | |  | Women | | |
| --- | --- | --- | --- | --- | --- | --- | --- |
| ＜350 g/day | ≥350 g/day | *P-*value* |  | ＜350 g/day | ≥350 g/day | *P-*value* |
| Mean ± SD | Mean ± SD |  | Mean ± SD | Mean ± SD |
| Vegetables | 202.0 ± 93.2 | 494.1 ± 127.8 | <0.001 |  | 201.9 ± 86.3 | 506.6 ± 142.8 | <0.001 |
| Green-yellow vegetables | 70.8 ± 54.2 | 161.1 ± 101.0 | <0.001 |  | 74.0 ± 55.7 | 200.2 ± 113.2 | <0.001 |
| Tomatoes | 21.5 ± 34.0 | 54.9 ± 57.6 | <0.001 |  | 24.4 ± 36.6 | 72.1 ± 74.3 | <0.001 |
| Carrots | 12.0 ± 15.6 | 25.9 ± 35.7 | <0.001 |  | 11.8 ± 17.4 | 24.9 ± 33.1 | <0.001 |
| Spinach | 3.0 ± 12.9 | 6.4 ± 23.7 | 0.142 |  | 3.2 ± 11.9 | 8.3 ± 30.3 | 0.013 |
| Bell peppers | 5.7 ± 15.8 | 11.3 ± 22.6 | 0.017 |  | 6.2 ± 14.1 | 13.3 ± 23.7 | <0.001 |
| Other green-yellow vegetables | 28.6 ± 37.7 | 62.5 ± 70.8 | <0.001 |  | 28.5 ± 34.8 | 81.7 ± 89.0 | <0.001 |
| Other vegetables | 118.7 ± 73.1 | 267.0 ± 118.4 | <0.001 |  | 114.7 ± 69.9 | 257.2 ± 134.9 | <0.001 |
| Cabbages | 24.4 ± 38.2 | 48.1 ± 67.4 | <0.001 |  | 20.3 ± 36.8 | 49.9 ± 84.6 | <0.001 |
| Cucumbers | 10.6 ± 23.3 | 29.9 ± 56.4 | <0.001 |  | 10.8 ± 21.5 | 27.6 ± 47.5 | <0.001 |
| Daikon radish | 11.1 ± 22.5 | 29.7 ± 47.6 | <0.001 |  | 10.6 ± 25.5 | 25.9 ± 45.7 | <0.001 |
| Onions | 22.5 ± 29.7 | 51.1 ± 59.5 | <0.001 |  | 23.9 ± 31.7 | 37.7 ± 47.5 | <0.001 |
| Chinese cabbage | 1.5 ± 6.7 | 10.5 ± 44.8 | 0.030 |  | 5.6 ± 21.4 | 8.2 ± 37.6 | 0.339 |
| Other light-colored vegetables | 48.6 ± 45.6 | 97.8 ± 90.8 | <0.001 |  | 43.5 ± 46.6 | 108.0 ± 94.0 | <0.001 |
| Vegetable juices | 5.2 ± 31.2 | 53.9 ± 107.3 | <0.001 |  | 6.6 ± 34.0 | 38.8 ± 87.9 | <0.001 |
| Fermented or pickled vegetables | 7.3 ± 15.9 | 12.1 ± 19.1 | 0.021 |  | 6.5 ± 15.6 | 10.3 ± 22.9 | 0.022 |
| Fermented or pickled leafy vegetables | 2.8 ± 11.6 | 4.5 ± 13.5 | 0.259 |  | 3.5 ± 13.6 | 4.4 ± 15.9 | 0.444 |
| Fermented or pickled radish or other vegetables | 4.5 ± 11.5 | 7.6 ± 14.1 | 0.041 |  | 3.0 ± 8.2 | 5.9 ± 17.5 | 0.018 |

SD, standard deviation

**P-*values were caluculated using the independent samples t-tests to compare differences between participants consuming less than 350 g/day (<350 g/day) and those consuming 350 g/day or more (≥350 g/day).
