# Supplementary material for: Home food environment influences the achievement of the recommended daily vegetable intake of 350 g in Japan
Source: Research Square preprint supplement (doi:10.21203/rs.3.rs-6141964/v1), 2025-04-17
Supplement: Supplementary file 3 [file d21e2c88ddceb194ab3962fb.docx]

Additional File 3. Total energy-adjusted average nutrient intake for each nutrient in vegetable intake groups

| Variables | Men | | |  | Women | | |
| --- | --- | --- | --- | --- | --- | --- | --- |
| <350 g/day | ≥350 g/day | *P-*value* |  | <350 g/day | ≥350 g/day | *P-*value* |
| Mean (95%CI) | Mean (95%CI) |  | Mean (95%CI) | Mean (95%CI) |
| Energy (kcal) | 2114.1 (2043.2-2187.4) | 2242.6 (2145.6-2343.9) | 0.751 |  | 1666.3 (1629.0-1704.5) | 1801.6 (1741.6-1863.7) | 0.030 |
| Protein (g) | 84.0 (82.0-85.9) | 88.2 (86.2-90.1) | 0.059 |  | 68.7 (66.7-70.7) | 73.2 (71.2-75.1) | 0.002 |
| Fat (g) | 77.4 (75.5-79.4) | 80.9 (78.9-82.9) | 0.042 |  | 62.7 (60.7-64.6) | 62.6 (60.6-64.6) | 0.944 |
| Carbohydrates |  |  |  |  |  |  |  |
| Carbohydrates (g) | 268.1 (266.1-270.1) | 258.0 (256.0-259.9) | 0.109 |  | 216.4 (214.4-218.4) | 213.8 (211.9-215.8) | 0.371 |
| Total dietary fiber (g) | 17.9 (15.9-19.9) | 22.8 (20.8-24.8) | <0.001 |  | 15.5 (13.5-17.5) | 20.7 (18.8-22.7) | <0.001 |
| Dietary fiber soluble (g) | 3.3 (1.4-5.3) | 4.6 (2.7-6.6) | <0.001 |  | 4.1 (2.2-6.1) | 5.6 (3.7-7.6) | <0.001 |
| Dietary fiber insoluble (g) | 11.1 (9.2-13.1) | 14.8 (12.8-16.8) | <0.001 |  | 11.0 (9.0-13.0) | 15.4 (13.4-17.3) | <0.001 |
| Fat-soluble vitamins |  |  |  |  |  |  |  |
| Vitamin A (µg) | 416.7 (414.6-418.7) | 663.7 (661.6-665.8) | <0.001 |  | 400.2 (398.2-402.1) | 616.7 (614.7-618.7) | <0.001 |
| Vitamin D (µg) | 4.9 (2.9-6.8) | 6.8 (4.8-8.7) | 0.144 |  | 7.2 (5.2-9.1) | 7.8 (5.9-9.8) | 0.740 |
| Vitamin E (mg) | 7.2 (5.3-9.2) | 9.0 (7.0-10.9) | <0.001 |  | 7.0 (5.0-8.9) | 9.4 (7.5-11.4) | <0.001 |
| Vitamin K (µg) | 223.8 (221.8-225.8) | 334.9 (332.8-336.9) | <0.001 |  | 209.4 (207.5-211.4) | 340.7 (338.7-342.7) | <0.001 |
| Water-soluble vitamins |  |  |  |  |  |  |  |
| Vitamin B1 (mg) | 1.0 (-1.0-2.9) | 1.1 (-0.8-3.1) | <0.001 |  | 0.8 (-1.1-2.8) | 1.0 (-0.9-3.0) | <0.001 |
| Vitamin B2 (mg) | 0.6 (-1.4-2.5) | 0.7 (-1.3-2.7) | 0.021 |  | 0.5 (-1.4-2.5) | 0.6 (-1.4-2.5) | <0.001 |
| Niacin (mg) | 37.0 (35.0-39.0) | 41.0 (39.0-42.9) | 0.004 |  | 29.2 (27.3-31.2) | 32.9 (30.9-34.8) | <0.001 |
| Vitamin B6 (mg) | 0.4 (-1.6-2.3) | 0.6 (-1.3-2.6) | <0.001 |  | 0.3 (-1.7-2.2) | 0.5 (-1.4-2.5) | <0.001 |
| Vitamin B12 (µg) | 6.2 (4.3-8.2) | 7.2 (5.2-9.2) | 0.411 |  | 5.6 (3.6-7.5) | 5.6 (3.6-7.5) | 0.693 |
| Folic acid (µg) | 278.4 (276.4-280.4) | 397.4 (395.4-399.4) | <0.001 |  | 261.5 (259.5-263.5) | 388.6 (386.6-390.5) | <0.001 |
| Pantothenic acid (mg) | 6.1 (4.1-8.1) | 6.9 (5.0-8.9) | <0.001 |  | 4.7 (2.8-6.7) | 5.5 (3.6-7.5) | <0.001 |
| Vitamin C (mg) | 76.0 (74.0-77.9) | 114.6 (112.6-116.5) | <0.001 |  | 74.7 (72.7-76.7) | 125.7 (123.8-127.7) | <0.001 |
| Minerals |  |  |  |  |  |  |  |
| Sodium (mg) | 4035.6 (4033.6-4037.6) | 4259.8 (4257.8-4261.8) | 0.308 |  | 3392.4 (3390.4-3394.4) | 3665.2 (3663.2-3667.2) | 0.004 |
| Potassium (mg) | 2321.5 (2319.5-2323.5) | 3060.0 (3058.0-3062.0) | <0.001 |  | 2174.8 (2172.8-2176.8) | 2883.5 (2881.5-2885.5) | <0.001 |
| Calcium (mg) | 538.3 (536.3-540.3) | 622.0 (620.0-624.0) | 0.010 |  | 526.1 (524.1-528.0) | 604.8 (602.8-606.7) | <0.001 |
| Magnesium (mg) | 269.1 (267.2-271.1) | 331.6 (329.6-333.5) | <0.001 |  | 246.7 (244.7-248.7) | 296.6 (294.7-298.6) | <0.001 |
| Phosphorus (mg) | 1151.6 (1149.6-1153.6) | 1269.8 (1267.8-1271.8) | 0.001 |  | 1002.1 (1000.1-1004.1) | 1110.3 (1108.3-1112.3) | <0.001 |
| Iron (mg) | 8.2 (6.3-10.2) | 10.3 (8.3-12.2) | <0.001 |  | 8.0 (6.0-10.0) | 9.5 (7.5-11.5) | <0.001 |
| Zinc (mg) | 10.2 (8.3-12.2) | 11.1 (9.1-13.0) | <0.001 |  | 6.9 (5.0-8.9) | 7.5 (5.6-9.5) | <0.001 |
| Copper (mg) | 1.2 (-0.7-3.2) | 1.4 (-0.5-3.4) | <0.001 |  | 1.0 (-1.0-3.0) | 1.2 (-0.8-3.1) | <0.001 |
| Manganese (mg) | 3.2 (1.3-5.2) | 3.6 (1.6-5.5) | 0.051 |  | 3.4 (1.4-5.3) | 3.9 (1.9-5.8) | <0.001 |
| Iodine (mg) | 200.9 (198.8-203.0) | 288.5 (286.4-290.7) | 0.590 |  | 758.4 (756.4-760.4) | 822.6 (820.5-824.6) | 0.965 |

CI, confidence interval

**P*-values were calculated using a general linear model with the natural logarithm-transformed mean for significance testing to compare differences between participants consuming less than 350 g/day (<350 g/day) and those consuming 350 g/day or more (≥350 g/day). Total energy intake and age were used as an adjusted variable.
